# Supplementary material
Source: PubMed Central journal article supplement (PMC7302441)
Supplement: ehp5304.s001.acco.pdf [file ehp5304.s001.acco.pdf]

**Note to readers with disabilities:** *EHP* strives to ensure that all journal content is accessible to all readers. However, some figures and Supplemental Material published in *EHP* articles may not conform to [508 standards](#) due to the complexity of the information being presented. If you need assistance accessing journal content, please contact [ehp508@niehs.nih.gov](mailto:ehp508@niehs.nih.gov). Our staff will work with you to assess and meet your accessibility needs within 3 working days.

### **Supplemental Material**

#### **Fine Particulate Matter and Poor Cognitive Function among Chinese Older Adults: Evidence from a Community-Based, 12-Year Prospective Cohort Study**

Jiaonan Wang, Tiantian Li, Yuebin Lv, Virginia Byers Kraus, Yi Zhang, Chen Mao, Zhaoxue Yin, Wanying Shi, Jinhui Zhou, Tongzhang Zheng, Patrick L. Kinney, John Ji, Song Tang, and Xiaoming Shi

#### **Table of Contents**

**Table S1.** The differences in characteristics between men and women.

**Table S2.** The correlation matrix of individual-level PM<sub>2.5</sub> exposure from the year of 2002 to 2014.

**Figure S1.** The distribution of PM<sub>2.5</sub> over the entire study period from 2002 to 2014.

**Table S3.** The association of PM<sub>2.5</sub> and poor cognitive function (MMSE<18) in crude models or in model adjusted for age among Chinese older adults aged 65 years and older.

**Table S4.** Sensitivity analyses: The association of PM<sub>2.5</sub> and poor cognitive function (MMSE<18) after excluding deaths in the first year or removing participants lost to follow up among Chinese older adults aged 65 years and older.

## Supplementary materials

**Table S-1. The differences in characteristics between men and women**

| Variable                 | Men         | Women       |
|--------------------------|-------------|-------------|
| Number of participants   | 6334 (100)  | 6990 (100)  |
| Age (year)               | 84.2±9.9    | 87.5±11.1   |
| Residence                |             |             |
| Urban                    | 1172 (18.5) | 1335 (19.1) |
| Rural                    | 5162 (81.5) | 5655 (80.9) |
| Marital status           |             |             |
| In marriage              | 3607 (56.9) | 1915 (27.4) |
| Not in marriage          | 2727 (43.1) | 5075 (72.6) |
| Educational background   |             |             |
| Illiterate               | 2244 (35.4) | 5548 (79.4) |
| Literate                 | 4090 (64.6) | 1442 (20.6) |
| Living pattern           |             |             |
| With family member       | 5409 (85.4) | 5734 (82.0) |
| Alone or in nursing home | 925 (14.6)  | 1256 (18.0) |
| Tobacco smoking status   |             |             |
| Non-smoker               | 2449 (38.7) | 6108 (87.4) |
| Current smoker           | 2484 (39.2) | 519 (7.4)   |
| Former smoker            | 1401 (22.1) | 363 (5.2)   |
| Alcohol drinking status  |             |             |
| Non-drinker              | 3086 (48.7) | 5973 (85.5) |
| Current drinker          | 2278 (36.0) | 742 (10.6)  |
| Former drinker           | 970 (15.3)  | 275 (3.9)   |
| Regular exercise         |             |             |
| No                       | 3932 (62.1) | 5131 (73.4) |
| Yes                      | 2402 (37.9) | 1859 (26.6) |

---

|                     |             |             |
|---------------------|-------------|-------------|
| Hypertension        |             |             |
| No                  | 3359 (53.0) | 3612(51.7)  |
| Yes                 | 2975 (47.0) | 3378 (48.3) |
| Heart disease       |             |             |
| No                  | 5907 (93.3) | 6406 (91.6) |
| Yes                 | 427 (6.7)   | 584 (8.4)   |
| Diabetes            |             |             |
| No                  | 6193 (97.8) | 6831 (97.7) |
| Yes                 | 141 (2.2)   | 159 (2.3)   |
| Respiratory disease |             |             |
| No                  | 5513 (87.0) | 6338 (90.7) |
| Yes                 | 821 (13.0)  | 652 (9.3)   |
| Disability          |             |             |
| No                  | 5850 (92.4) | 5954(85.2)  |
| Yes                 | 484 (7.6)   | 1036(14.8)  |
| Co-morbidity        |             |             |
| No                  | 5075 (80.1) | 5738(82.1)  |
| Yes                 | 1259 (19.9) | 1252(17.9)  |

---

**Table S-2. The correlation matrix of individual-level PM<sub>2.5</sub> exposure from the year of 2002 to 2014**

| <b>PM<sub>2.5</sub></b> | <b>2002</b> | <b>2003</b> | <b>2004</b> | <b>2005</b> | <b>2006</b> | <b>2007</b> | <b>2008</b> | <b>2009</b> | <b>2010</b> | <b>2011</b> | <b>2012</b> | <b>2013</b> | <b>2014</b> |
|-------------------------|-------------|-------------|-------------|-------------|-------------|-------------|-------------|-------------|-------------|-------------|-------------|-------------|-------------|
| 2002                    | 1.00        | -           | -           | -           | -           | -           | -           | -           | -           | -           | -           | -           | -           |
| 2003                    | 0.94        | 1.00        | -           | -           | -           | -           | -           | -           | -           | -           | -           | -           | -           |
| 2004                    | 0.94        | 0.89        | 1.00        | -           | -           | -           | -           | -           | -           | -           | -           | -           | -           |
| 2005                    | 0.96        | 0.92        | 0.96        | 1.00        | -           | -           | -           | -           | -           | -           | -           | -           | -           |
| 2006                    | 0.92        | 0.93        | 0.89        | 0.94        | 1.00        | -           | -           | -           | -           | -           | -           | -           | -           |
| 2007                    | 0.94        | 0.96        | 0.89        | 0.93        | 0.94        | 1.00        | -           | -           | -           | -           | -           | -           | -           |
| 2008                    | 0.95        | 0.96        | 0.9         | 0.92        | 0.92        | 0.97        | 1.00        | -           | -           | -           | -           | -           | -           |
| 2009                    | 0.94        | 0.94        | 0.88        | 0.9         | 0.9         | 0.95        | 0.98        | 1.00        | -           | -           | -           | -           | -           |
| 2010                    | 0.92        | 0.96        | 0.86        | 0.93        | 0.93        | 0.95        | 0.94        | 0.92        | 1.00        | -           | -           | -           | -           |
| 2011                    | 0.95        | 0.94        | 0.88        | 0.93        | 0.93        | 0.96        | 0.96        | 0.96        | 0.96        | 1.00        | -           | -           | -           |
| 2012                    | 0.93        | 0.93        | 0.9         | 0.95        | 0.96        | 0.96        | 0.96        | 0.93        | 0.94        | 0.96        | 1.00        | -           | -           |
| 2013                    | 0.93        | 0.96        | 0.84        | 0.91        | 0.93        | 0.95        | 0.95        | 0.95        | 0.96        | 0.98        | 0.95        | 1.00        | -           |

2014 0.93 0.96 0.88 0.91 0.91 0.96 0.97 0.96 0.95 0.96 0.95 0.96 1.00

---

† All the *P* value of the correlation coefficients were <0.001.

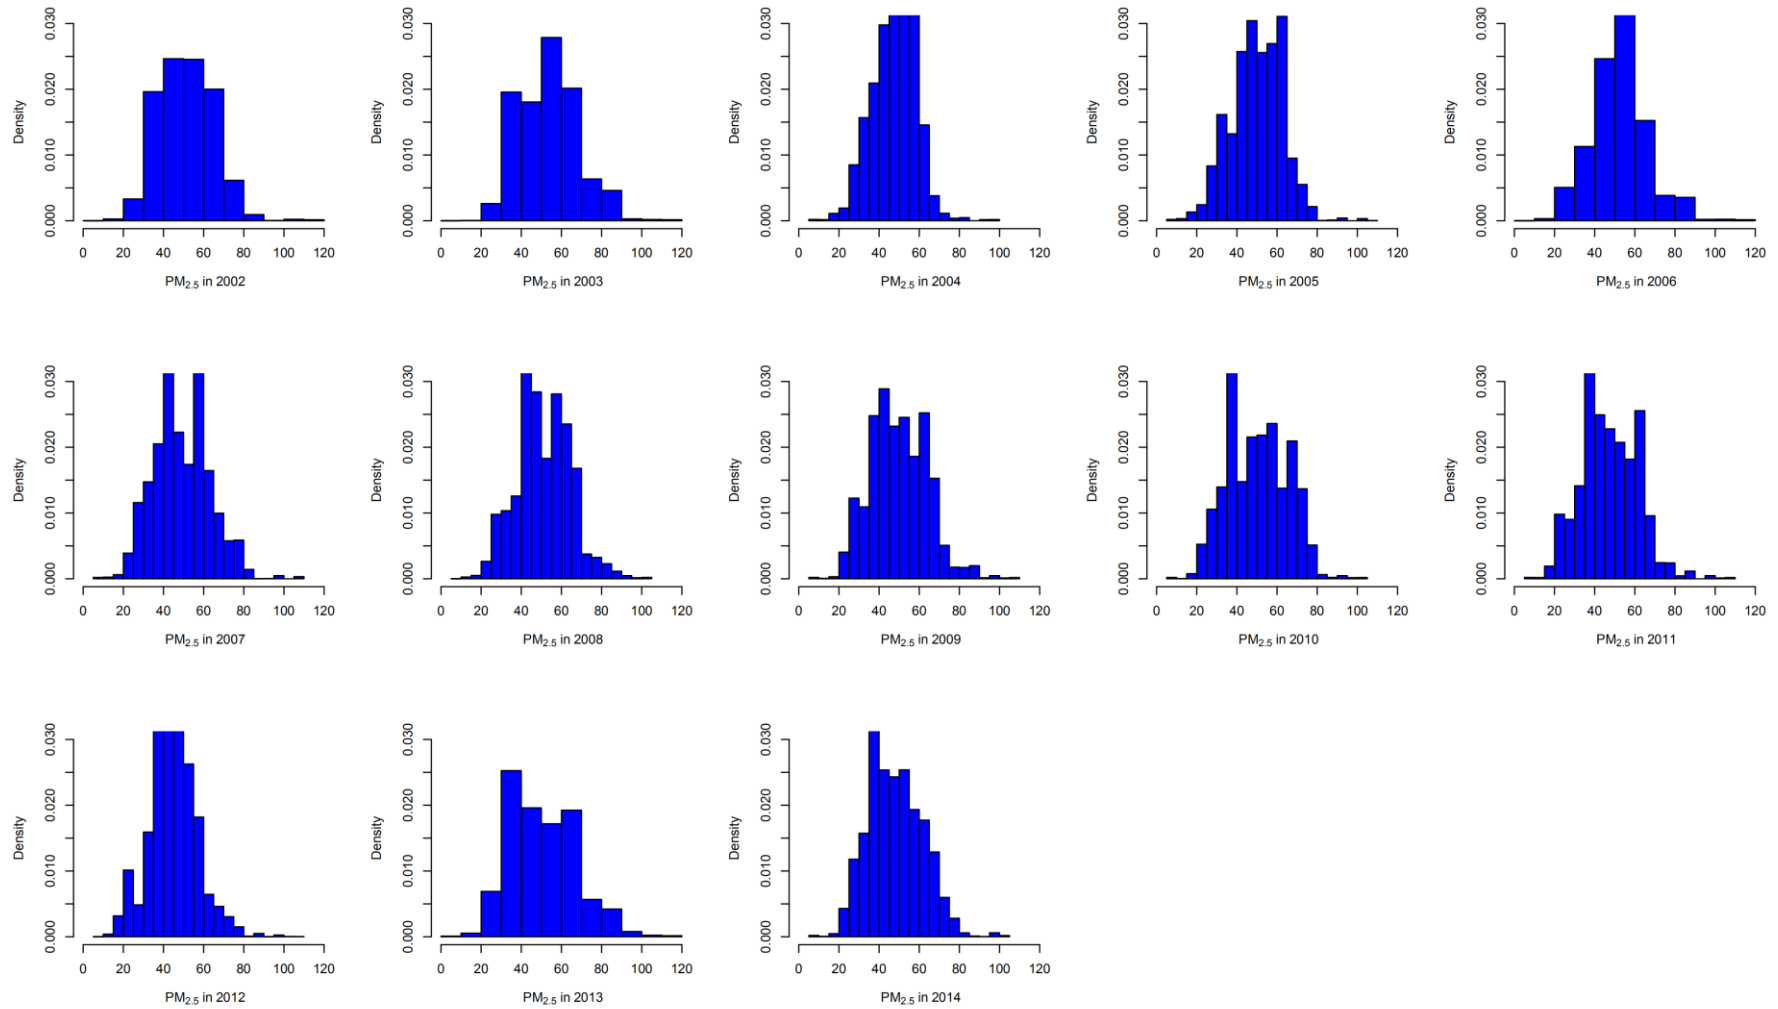

**Figure S-1.** The distribution of PM<sub>2.5</sub> over the entire study period from 2002 to 2014

**Table S-3.** The association of PM<sub>2.5</sub> and poor cognitive function (MMSE<18) in crude models or in model adjusted for age among Chinese older adults aged 65 years and older.

| PM <sub>2.5</sub>                                            | Events | Participants | Crude model        | Model 1            | Final model        |
|--------------------------------------------------------------|--------|--------------|--------------------|--------------------|--------------------|
| <b>Each 10 ug/m<sup>3</sup> increase in PM<sub>2.5</sub></b> | 3271   | 13324        | 1.044(1.017-1.071) | 1.054(1.028-1.081) | 1.051(1.023-1.079) |
| <b>PM<sub>2.5</sub> as categorical variable</b>              |        |              |                    |                    |                    |
| <b>First quartile(&lt;41.4μg/m<sup>3</sup>)</b>              | 773    | 3317         | 1.00               | 1.00               | 1.00               |
| <b>Second quartile(≥41.4–50.3μg/m<sup>3</sup>)</b>           | 844    | 3366         | 1.12(1.02-1.24)    | 1.19(1.08-1.31)    | 1.20(1.09-1.33)    |
| <b>Third quartile(≥50.3–60.7μg/m<sup>3</sup>)</b>            | 838    | 3370         | 1.23(1.12-1.36)    | 1.29(1.17-1.42)    | 1.27(1.15-1.41)    |
| <b>Forth quartile(≥60.7μg/m<sup>3</sup>)</b>                 | 816    | 3271         | 1.29(1.17-1.42)    | 1.24(1.13-1.37)    | 1.21(1.09-1.34)    |
| <b>P-value for trend</b>                                     |        |              |                    |                    | <0.001             |
| <b>PM<sub>2.5</sub> categorized by Chinese guidelines</b>    |        |              |                    |                    |                    |
| <b>&lt;15 ug/m<sup>3</sup></b>                               | 2      | 20           | 0.34(0.09-1.43)    | 0.45(0.11-1.81)    | 0.50(0.12-2.00)    |
| <b>≥15-35 ug/m<sup>3</sup></b>                               | 364    | 1555         | 1.00               | 1.00               | 1.00               |
| <b>≥35-75 ug/m<sup>3</sup></b>                               | 2772   | 11225        | 1.11(0.99-1.24)    | 1.20(1.07-1.33)    | 1.20(1.09-1.34)    |
| <b>≥75 ug/m<sup>3</sup></b>                                  | 133    | 524          | 1.12 (0.92-1.37)   | 1.20(0.98-1.46)    | 1.28(1.04-1.59)    |

---

**P-value for trend**<0.001

---

Model 1: Adjusted for age(continuous);

Final model: Adjusted covariates including age (continuous); sex, residence, current marital status, living pattern, education (literacy status), smoking status, alcohol drinking status, regular exercise, diabetes, heart disease, hypertension, respiratory disease, disability in activities of daily living, gross domestic product (GDP), physicians per 1000 Persons at prefecture-level.

**Table S-4.** Sensitivity analyses: The association of PM<sub>2.5</sub> and poor cognitive function (MMSE<18) after excluding deaths in the first year or removing participants lost to follow up among Chinese older adults aged 65 years and older

| PM <sub>2.5</sub>                                            | Excluding deaths in the first year |              |                     | Removing participants lost to follow up |              |                     |
|--------------------------------------------------------------|------------------------------------|--------------|---------------------|-----------------------------------------|--------------|---------------------|
|                                                              | Events                             | Participants | Cumulative exposure | Events                                  | Participants | Cumulative exposure |
| <b>Each 10 ug/m<sup>3</sup> increase in PM<sub>2.5</sub></b> | 3271                               | 12459        | 1.056(1.029-1.084)  | 3271                                    | 11901        | 1.062(1.034-1.089)  |
| <b>PM<sub>2.5</sub> as categorical variable</b>              |                                    |              |                     |                                         |              |                     |
| <b>First quartile(&lt;41.4µg/m<sup>3</sup>)</b>              | 773                                | 3100         | 1.00                | 773                                     | 3073         | 1.00                |
| <b>Second quartile(≥41.4–50.3µg/m<sup>3</sup>)</b>           | 844                                | 3139         | 1.20(1.09-1.33)     | 844                                     | 3043         | 1.21(1.09-1.33)     |
| <b>Third quartile(≥50.3–60.7µg/m<sup>3</sup>)</b>            | 838                                | 3156         | 1.29(1.17-1.42)     | 838                                     | 2945         | 1.31(1.19-1.45)     |

---



|                                                                     |      |       |                 |      |       |                  |
|---------------------------------------------------------------------|------|-------|-----------------|------|-------|------------------|
| <b>Forth quartile(<math>\geq 60.7\mu\text{g}/\text{m}^3</math>)</b> | 816  | 3064  | 1.24(1.12-1.37) | 816  | 2840  | 1.27(1.15-1.41)  |
| <b>P-value for trend</b>                                            |      |       |                 |      |       | <0.001           |
| <b>PM<sub>2.5</sub> categorized by Chinese guidelines</b>           |      |       | <0.001          |      |       |                  |
| <15 ug/m <sup>3</sup>                                               | 2    | 18    | 0.50(0.13-2.03) | 2    | 17    | 0.45(0.11-1.82)  |
| $\geq 15\text{-}35$ ug/m <sup>3</sup>                               | 364  | 1449  | 1.00            | 364  | 1403  | 1.00             |
| $\geq 35\text{-}75$ ug/m <sup>3</sup>                               | 2772 | 10495 | 1.22(1.09-1.36) | 2772 | 10005 | 1.21(1.08-1.35)  |
| $\geq 75$ ug/m <sup>3</sup>                                         | 133  | 497   | 1.28(1.05-1.57) | 133  | 476   | 1.24 (1.01-1.52) |
| <b>P-value for trend</b>                                            |      |       | <0.001          |      |       | <0.001           |

Adjusted covariates including age (continuous); sex, residence, current marital status, living pattern, education (literacy status), smoking status, alcohol drinking status, regular exercise, diabetes, heart disease, hypertension, respiratory disease, disability in activities of daily living, gross domestic product (GDP), physicians per 1000 Persons at prefecture-level
