# Supplementary material
Source: PubMed Central journal article supplement (PMC7302441)
Supplement: ehp5304.smcontents.508.pdf [file ehp5304.smcontents.508.pdf]

**Note to readers with disabilities:** *EHP* strives to ensure that all journal content is accessible to all readers. However, some figures and Supplemental Material published in *EHP* articles may not conform to [508 standards](#) due to the complexity of the information being presented. If you need assistance accessing journal content, please contact [ehp508@niehs.nih.gov](mailto:ehp508@niehs.nih.gov). Our staff will work with you to assess and meet your accessibility needs within 3 working days.

### **Supplemental Material**

#### **Fine Particulate Matter and Poor Cognitive Function among Chinese Older Adults: Evidence from a Community-Based, 12-Year Prospective Cohort Study**

Jiaonan Wang, Tiantian Li, Yuebin Lv, Virginia Byers Kraus, Yi Zhang, Chen Mao, Zhaoxue Yin, Wanying Shi, Jinhui Zhou, Tongzhang Zheng, Patrick L. Kinney, John Ji, Song Tang, and Xiaoming Shi

#### **Table of Contents**

**Table S1.** The differences in characteristics between men and women.

**Table S2.** The correlation matrix of individual-level PM<sub>2.5</sub> exposure from the year of 2002 to 2014.

**Figure S1.** The distribution of PM<sub>2.5</sub> over the entire study period from 2002 to 2014.

**Table S3.** The association of PM<sub>2.5</sub> and poor cognitive function (MMSE<18) in crude models or in model adjusted for age among Chinese older adults aged 65 years and older.

**Table S4.** Sensitivity analyses: The association of PM<sub>2.5</sub> and poor cognitive function (MMSE<18) after excluding deaths in the first year or removing participants lost to follow up among Chinese older adults aged 65 years and older.
